# Supplementary material for: Prognostic value of plasma adipokine chemerin in patients with coronary artery disease
Source: PubMed Central journal article supplement (PMC9493186; doi:10.3389/fcvm.2022.968349), 2022-09-08
Supplement: Data_Sheet_1.pdf [file Data_Sheet_1.pdf]

## *Supplementary Material*

### Supplementary Tables and Figures

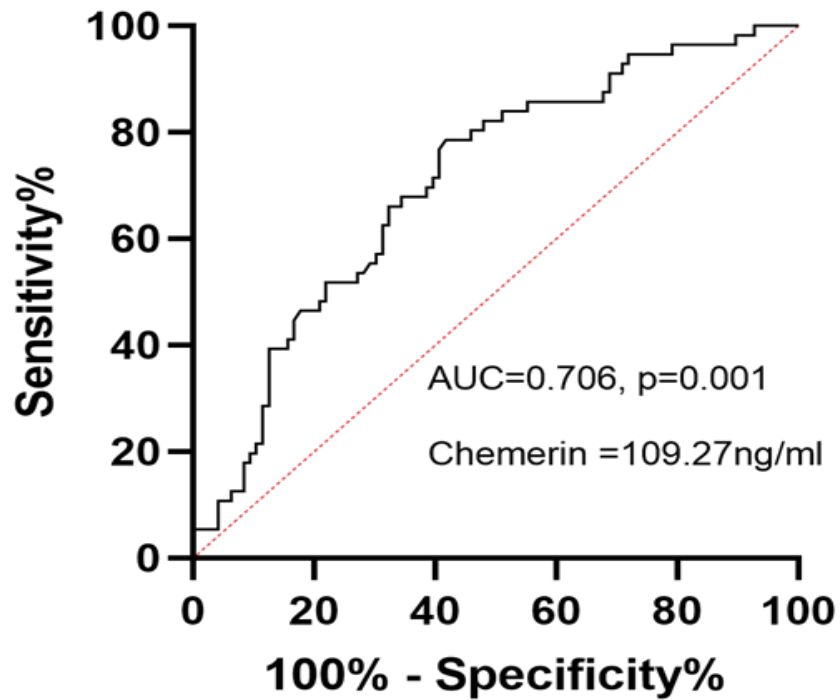

**Supplementary Figure 1.** The receiver-operating characteristic curve of chemerin to predict major adverse cardiovascular events. AUC, area under the curve.

**Supplementary Table 1. Baseline characteristics of patients with high or low chemerin levels.**

| Variable                    | Low chemerin<br>n = 67 | High chemerin<br>n = 85 | P-value |
|-----------------------------|------------------------|-------------------------|---------|
| <b>Demographics</b>         |                        |                         |         |
| Age, years                  | 63.24 ± 11.32          | 66.39 ± 11.36           | 0.086   |
| Male, n (%)                 | 37(44)                 | 39(58)                  | 0.102   |
| BMI, kg/m <sup>2</sup>      | 24.54 ± 3.13           | 24.58 ± 3.77            | 0.948   |
| SBP, mmHg                   | 143.37 ± 23.47         | 144.08 ± 21.94          | 0.849   |
| DBP, mmHg                   | 80.64 ± 13.38          | 82.847 ± 12.53          | 0.296   |
| <b>Comorbidities, n (%)</b> |                        |                         |         |
| CAD                         | 27(40.3)               | 48(56.5)                | 0.001   |
| Diabetes mellitus           | 10(14.9)               | 28(32.9)                | 0.011   |
| Smoking                     | 14(20.9)               | 18(21.2)                | 0.966   |
| Hypertension                | 38(56.7)               | 60(70.6)                | 0.076   |
| Hyperlipidemia              | 6(9.0)                 | 10(11.8)                | 0.575   |
| Stroke                      | 7(10.4)                | 13(15.3)                | 0.380   |
| <b>Medications, n (%)</b>   |                        |                         |         |
| Statin                      | 7(10.4)                | 16(18.8)                | 0.153   |
| ACEI / ARB                  | 9(13.4)                | 13(15.3)                | 0.746   |
| CCB                         | 7(10.4)                | 20(23.5)                | 0.036   |
| β-Blocker                   | 4(6)                   | 4(4.7)                  | 0.729   |
| <b>Laboratory data</b>      |                        |                         |         |
| LVEF, %                     | 64.36 ± 8.43           | 63.95 ± 8.26            | 0.766   |
| Pro-BNP                     | 111(46.7 - 233)        | 140(52 - 416)           | 0.068   |
| TC, mmol                    | 4.52 ± 1.01            | 4.54 ± 1.14             | 0.897   |
| TG, mmol/L                  | 1.33(1.02 - 1.80)      | 1.57(1.10 - 2.24)       | 0.053   |
| HDL-C, mmol/L               | 1.17 ± 0.28            | 1.10 ± 0.31             | 0.154   |
| LDL-C, mmol/L               | 2.59(1.90 - 2.86)      | 2.47(2.11 - 3.05)       | 0.815   |
| FPG, mmol/L                 | 5.1(4.7 - 5.7)         | 5.4(4.9 - 6.5)          | 0.008   |
| HbA1c, mmol/L               | 5.9(5.5 - 6.3)         | 6.0(5.5 - 6.6)          | 0.433   |
| HsCRP, mg/L                 | 3.4(3.3 - 6.9)         | 3.5(3.3 - 8.1)          | 0.463   |
| AST, U/L                    | 18(14 - 23)            | 19 (16 - 25)            | 0.392   |
| ALT, U/L                    | 18(11 - 26)            | 18(14 - 26)             | 0.493   |
| BUN, mmol/L                 | 5.67 ± 1.78            | 6.11 ± 2.34             | 0.201   |
| Creatinine, mg/L            | 76.0(64.0 - 87.9)      | 79.0(71.0 - 92.5)       | 0.214   |
| Uric acid, mg/L             | 349.02 ± 97.18         | 353.80 ± 103.37         | 0.772   |
| Adiponectin, mg/mL          | 11.50 ± 7.47           | 11.17 ± 9.25            | 0.249   |
| Chemerin, ng/mL             | 90.39 ± 12.45          | 142.48 ± 27.21          | 0.001   |

Values are mean ± SD, median (interquartile range), or n (%). CAD, coronary artery disease; BMI, body mass index; SBP, systolic blood pressure; DBP, diastolic blood pressure; n, number of patients; ACEI/ARB, angiotensin-converting enzyme inhibitor and angiotensin receptor block agent; CCB,

calcium channel blocker; LVEF, left ventricular ejection fraction; Pro-BNP, pro-brain natriuretic peptide; TC, total cholesterol; TG: Triglycerides; LDL-C, low-density lipoprotein cholesterol; HDL-C, high-density lipoprotein cholesterol; FPG, fasting plasma glucose; HbA1c: Hemoglobin A1c; AST, aspartate transaminase; BUN, blood urine nitrogen; hsCRP, high sensitivity CRP.

**Supplementary Table 2. Results of binary logistic regression analysis for correlative factors with CAD at baseline.**

| Variables      | Univariable    |               |         | Multivariable  |               |         |
|----------------|----------------|---------------|---------|----------------|---------------|---------|
|                | Exp( $\beta$ ) | 95% CI        | P-Value | Exp( $\beta$ ) | 95% CI        | P-value |
| Age, y         | 1.003          | 0.975 - 1.031 | 0.853   | 0.996          | 0.964 - 1.029 | 0.799   |
| Male           | 0.656          | 0.344 - 1.248 | 0.199   | 0.605          | 0.275 - 1.331 | 0.212   |
| Hypertension   | 1.311          | 0.674 - 2.552 | 0.425   | 1.085          | 0.515 - 2.283 | 0.830   |
| DM             | 2.293          | 1.067 - 4.927 | 0.033   | 2.115          | 0.889 - 5.035 | 0.091   |
| Hyperlipidemia | 1.286          | 0.453 - 3.650 | 0.637   | 1.396          | 0.454 - 4.291 | 0.560   |
| Smoking        | 1.842          | 0.827 - 4.101 | 0.135   | 1.545          | 0.592 - 4.035 | 0.374   |
| Obesity        | 0.871          | 0.445 - 1.706 | 0.688   | 0.775          | 0.359 - 1.673 | 0.517   |
| High chemerin  | 2.967          | 1.526 - 5.769 | 0.001   | 2.702          | 1.344 - 5.431 | 0.005   |

CI, confidence interval; CAD, coronary artery disease; DM: Diabetes mellitus; Obesity is defined as BMI  $\geq$  25 kg/m<sup>2</sup>.

### Sample Size Calculation

We projected a 5-year major adverse cardiovascular events of 19% in patients with coronary artery diseases and 3% in patients with no-obstructive coronary artery diseases according to the previous reports. Sample size estimates are predicated on the following assumptions:

- a trial duration of 5.5 years;
- 6 months to complete patient enrollment;
- average follow-up duration of 5.5 months;
- two-sided tests of significance at an alpha = 0.05;
- power of test 90%;

The total sample size was calculated to be 104, with 52 in the CAD group and 52 in the control group. Through six months of enrollment, we finally included 152 participants, 77 in the CAD group and 75 in the control group.
